# Supplementary material
Source: MDPI journal article supplement (https://www.mdpi.com/2311-7524/9/7/746)
Supplement: s1 [file s1 › horticulturae-2424613-supplementary.pdf]

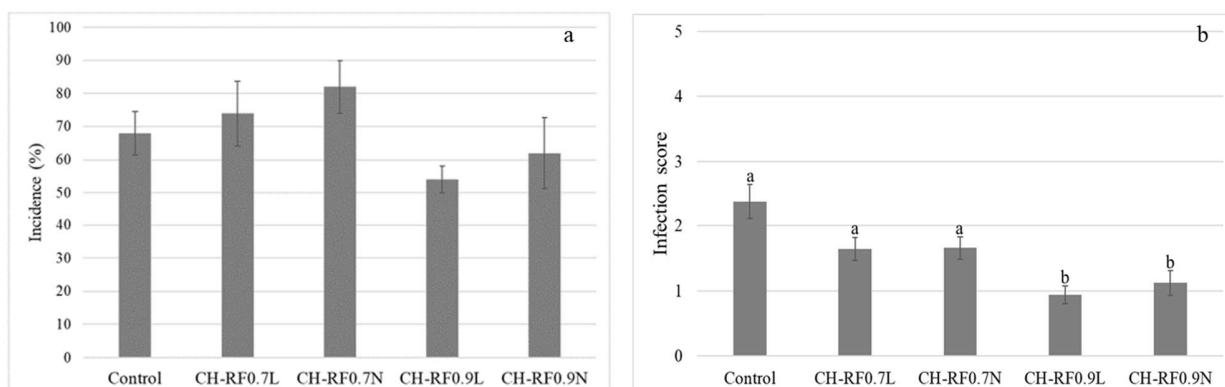

**Supplementary Figure S1. a)** Disease Incidence (%) and **b)** Disease Severity (Infection score) caused by *B. cinerea* in table grapes (cv. Flame Seedless) according to Chitosan-Riboflavin molecule (CH-RF) 0.7% w/v exposed to white led light (CH-RF0.7L), CH-RF 0.7% w/v exposed to natural light (CH-RF 0.7N), CH-RF 0.9% expose to white led light (CH-RF0.9L), and CH-RF 0.9% w/v exposed to natural light (BS0.9N). Infection was scored at 5 dpi from 0 to 5 (see Section 5 in Materials and Methods). The results were subjected to a Kruskal-Wallis Test ( $p < 0.01$ ). Different letters indicate significant differences according to Dunn's test. Error bars show the SE.
